# Priming of insulin granules for exocytosis by granular $\text{Cl}^-$ uptake and acidification

Sebastian Barg<sup>1</sup>, Ping Huang<sup>2</sup>, Lena Eliasson<sup>1</sup>, Deborah J. Nelson<sup>2</sup>, Stefanie Obermüller<sup>1</sup>, Patrik Rorsman<sup>1</sup>, Frank Thévenod<sup>3</sup> and Erik Renström<sup>1,\*</sup>

<sup>1</sup>Department of Physiological Sciences, Lund University, Sölvegatan 19, SE-223 62 Lund, Sweden

<sup>2</sup>University of Chicago, Department of Neurobiology, Pharmacology and Physiology, 947 E. 58<sup>th</sup> Street, MC 0926, Chicago, IL 60637, USA

<sup>3</sup>Physiologisches Institut, Universität des Saarlandes, D-66421 Homburg/Saar, Germany

\*Author for correspondence (e-mail: erik.renstrom@mphy.lu.se)

Accepted 3 March 2001

Journal of Cell Science 114, 2145–2154 (2001) © The Company of Biologists Ltd

## SUMMARY

ATP-dependent priming of the secretory granules precedes  $\text{Ca}^{2+}$ -regulated neuroendocrine secretion, but the exact nature of this reaction is not fully established in all secretory cell types. We have further investigated this reaction in the insulin-secreting pancreatic B-cell and demonstrate that granular acidification driven by a V-type  $\text{H}^+$ -ATPase in the granular membrane is a decisive step in priming. This requires simultaneous  $\text{Cl}^-$  uptake through granular CIC-3  $\text{Cl}^-$  channels. Accordingly, granule acidification and priming are inhibited by agents that prevent transgranular  $\text{Cl}^-$  fluxes, such as 4,4'-

diisothiocyanostilbene-2,2'-disulfonic acid (DIDS) and an antibody against the CIC-3 channels, but accelerated by increases in the intracellular ATP:ADP ratio or addition of hypoglycemic sulfonylureas. We suggest that this might represent an important mechanism for metabolic regulation of  $\text{Ca}^{2+}$ -dependent exocytosis that is also likely to be operational in other secretory cell types.

Key words: CIC-3 channels, Exocytosis, Granular pH, Insulin, Sulfonylureas

## INTRODUCTION

Priming of secretory vesicles prior to  $\text{Ca}^{2+}$ -induced exocytosis involves pairing of SNARE proteins on the vesicles and in the target membrane and biochemical loading by ATP-hydrolysis. Different priming enzymes have been proposed such as *N*-ethylmaleimide Sensitive Factor (NSF) (Hanson et al., 1997; Sutton et al., 1998) and phosphatidylinositol-4-phosphate-5-kinase (PtdInsP5K) (Hay et al., 1995), but the exact nature of the priming reaction in pancreatic B-cells remains elusive. Insulin secretion is indeed highly dependent on ATP (Eliasson et al., 1997) but NSF failed to reconstitute secretion in insulin-secreting HIT-T15 cells in which the endogenous protein was inactivated by different maneuvers (Kiraly-Borri, 1996). We have previously reported that hypoglycemic sulfonylureas enhance  $\text{Ca}^{2+}$ -dependent exocytosis in pancreatic B-cells (Eliasson et al., 1996). This action is mediated by a 65 kDa granular mdr1-like protein and depends on intracellular  $\text{Cl}^-$  fluxes (Barg et al., 1999). The identity and precise role of such  $\text{Cl}^-$  fluxes in exocytosis remain elusive, but they are known to play important roles in the pH regulation of cellular organelles (al-Awqati et al., 1992), including exocytotic granules. Mature secretory granules, including those of the B-cell, are in fact strongly acidic with a  $\text{pH} \approx 5$  and it is thought that a low intragranular pH is important for processing of the pro-hormone (Hutton, 1989).

Here we report that granular  $\text{Cl}^-$  uptake is important not only for the stimulation of exocytosis by sulfonylureas, but also for  $\text{Ca}^{2+}$ -induced B-cell exocytosis in general. Influx of  $\text{Cl}^-$

through granular CIC-3  $\text{Cl}^-$  channels stimulates exocytosis by facilitating  $\text{H}^+$ -pumping into the granules by a bafilomycin-sensitive V-type  $\text{H}^+$ -ATPase. This  $\text{Cl}^-$  flux prevents the development of a large electrical gradient over the granule membrane (positive inside) that would otherwise prevent  $\text{H}^+$ -pumping and acidification. We further demonstrate that granule acidification is a decisive step in the ATP-dependent priming of insulin granules for exocytosis. Consistent with this idea is the fact that agents that collapse the pH gradient or prevent  $\text{Cl}^-$  uptake largely abolish  $\text{Ca}^{2+}$ -induced exocytosis. ATP and ADP reciprocally regulate the CIC-3 channels and their activity increases when the cytoplasmic ATP:ADP ratio is high. By this mechanism, the secretory capacity of the B-cell is influenced by the metabolic state of the cell and this represents an extra level of metabolic regulation of insulin in addition to that mediated by the ATP-regulated  $\text{K}^+$ -channels (Ashcroft and Rorsman, 1995). This is functionally significant as it explains why metabolic stimuli exert a stronger stimulatory effect than those merely acting by membrane depolarization (Gembal et al., 1993).

## MATERIALS AND METHODS

### Antibody production and expression of hCIC-3

Antibody production and purification was performed by Quality Controlled Biochemicals, Inc. (Hopkinton, MA, USA). Two synthetic peptides coupled with Keyhole limpet hemocyanin (KLH, Pierce, IL, USA) were used to raise antibodies against hCIC-3 in rabbits. The

peptides corresponded to amino acids 59-74 (MTNGGSINSS-THLLDLC) of the N-terminal domain of hCIC-3 and amino acids 730-744 (GSSRVCFQAHTPSLPAAE) of the cytoplasmic C-terminal domain. The C-terminal cysteine in the N-terminal sequence and the alanine and glutamic acid residues in the C-terminal sequence were added in order to facilitate antigenicity. After a second boost, anti-hCIC-3<sub>59-74</sub> (anti-hCIC-3n) serum was affinity purified using peptide coupled to thiol coupling gel (Quality Controlled Biochemicals, Inc.). The bound IgG was eluted with 3 M MgCl<sub>2</sub>, 25% ethylene glycol and immediately neutralized to pH 7.4 with divalent-free PBS. The stock concentration was 0.072 mg/ml. Anti-hCIC-3<sub>730-744</sub> (anti-hCIC-3c) serum was affinity purified with peptide bound to amino-linked Sepharose gel and eluted with 0.1 M glycine. The stock concentration was 1.03 mg/ml.

The full-length hCIC-3 was subcloned into pcDNA3.1zeo+ vector (Invitrogen, CA, USA) and transfected into large-T-antigen-stabilized HEK 293 cells (tsA) using a SuperFect reagent kit (Qiagen, CA, USA). Stably transfected clonal cell lines were selected using zeocin (Invitrogen, CA, USA) at 400 µg/ml and maintained at 200 µg/ml. Expression of hCIC-3 was detected by immunoblotting and the homogeneity of the stable cell lines was confirmed by immunostaining. HEK 293 cell lines stably expressing hCIC-1, hCIC-4 and rat CIC-2 were kindly provided by Christoph Fahlke at the University of Ulm (hCIC-1 and hCIC-4) and Ken Blumenthal at the University of Cincinnati College of Medicine (rat CIC-2), respectively. The expression of hCIC-1, hCIC-4 and rat CIC-2 was confirmed by immunoblotting and electrophysiology studies.

### Immunoblot analysis

Cultured stably transfected tsA cells were harvested in H20E1D1 solution (20 mM Hepes, pH 8.0, 1 mM EDTA and 1 mM dithiothreitol) in the presence of protease inhibitor cocktail (Boehringer-Mannheim, IN, USA). In cells stably expressing hCIC-3, the membrane and cytosolic fractions were crudely separated by centrifugation of the whole-cell lysate at 70,000 rpm for 30 minutes at 4°C using Optima™ TL ultracentrifuge (Beckman Instruments, Inc., CA, USA). For the evaluation of antibody specificity, whole-cell lysate of HEK 293 cells expressing hCIC-1, hCIC-4 or rat CIC-2 was used. Protein denaturation was accomplished in 1/10 V of 10% SDS and 1 mM DTT at 95°C for 10 minutes. The protein thus obtained (100 µg) was incubated with 5 U of *N*-glycanase F (Oxford GlycoSciences Ltd, UK) for 18 hours at 37°C. Total protein (10 or 100 µg) was loaded on 7.5% SDS-PAGE gels, separated by electrophoresis and transferred to polyvinylidene difluoride membrane. Blots were incubated overnight at 4°C with the affinity-purified polyclonal anti-hCIC-3n at a 1:500 dilution, or anti-hCIC-3c at a 1:6000 dilution, and treated subsequently with donkey anti-rabbit antibody conjugated to horseradish peroxidase (Amersham Pharmacia Biotech, NJ, USA) at a 1:2000 dilution. Renaissance Western Blot Chemiluminescence Reagent Plus (NEN™ Life Sciences Products, MA, USA) was used for detection.

Whole mouse islet lysates were used for CIC-3 detection by western blotting. Proteins (100 µg/lane) were separated by SDS-PAGE on 7.5% acrylamide Laemmli minigels and transferred onto PVDF membranes (DuPont/NEN). The blots were incubated overnight with anti-hCIC-3n at a 1:500 dilution or anti-hCIC-3c (1:1000). After incubation with horseradish-peroxidase (HRP)-conjugated secondary antibody (1:50000 dilution, Pierce, IL, USA) for 60 minutes, blots were developed in enhanced chemiluminescence reagents and signals were visualized on X-ray films. The experiment was repeated three times with qualitatively identical results.

### Immunofluorescence

Islet cells were cultured on coverslips for 4-28 hours, fixed in 4% formaldehyde (Polyscience) in PBS and permeabilized with 0.1% Triton X100. After blocking of nonspecific sites with 5% normal donkey serum, cells were incubated overnight at 4°C with a 1:200

dilution of the rabbit-raised anti-hCIC-3c antibody or guinea pig anti-insulin antibody (Euro-Diagnostika, Sweden). TexasRed-conjugated donkey anti-rabbit and anti-guinea pig antibodies (Jackson Immuno, USA) were used to label the detected sites. Immunofluorescence was excited using the 543 nm line of a Zeiss 510 confocal microscope and visualized using a 63×/1.3NA oil objective and a >565 nm filter. Overlap of insulin and CIC-3 immunoreactivity was evaluated using the 'Overlay' option included in the Zeiss LSM510 software version 2.30.

### Electron microscopy

Intact pancreatic islets were fixed in 4% paraformaldehyde supplemented with 0.5% glutaraldehyde for 1 hour and embedded in Lowicryl® before being cut into ultrathin sections (60-80 nm) using an LKB MKIII ultratome. Immunoreactivity was detected using the anti-hCIC-3c antibody at 1:200 dilution and a donkey anti-rabbit secondary antibody conjugated with 12 nm gold particles, and visualized using a Philips CM10 electron microscope. The density of gold particles was calculated using software package from Scion Corporation, ML, USA.

To determine the number of lysosomes in the average B-cell, the volume density was estimated according to procedures of DeHoff and Rhines (1961), and averaged  $0.035 \pm 0.003$  lysosomes/µm<sup>3</sup>. By multiplying this value with the average B-cell volume ( $1376 \pm 84$  µm<sup>3</sup>) an estimate of the number of lysosomes per B-cell was obtained.

### Cells and electrophysiology

Mouse pancreatic B-cells were isolated and exocytosis monitored by combining the patch-clamp technique with measurements of cell capacitance as previously described (Barg et al, 1999). The standard whole-cell configuration was used in all experiments and the cells were voltage-clamped at -70 mV to prevent activation of the voltage-gated Ca<sup>2+</sup> channels. Exocytosis was elicited either by infusion of a Ca<sup>2+</sup>-EGTA buffer through the recording electrode (see Figs 1, 4, 6A) or by trains of ten 500-millisecond voltage-clamp depolarizations (rate: 1 Hz) from the holding potential to zero (Fig. 7A,B).

### Solutions

The extracellular solution consisted of (in mM) 138 NaCl, 5.6 KCl, 1.2 MgCl<sub>2</sub>, 2.6 CaCl<sub>2</sub>, 5 D-glucose and 5 Hepes (pH 7.4 with NaOH). In Fig. 5, a Ca<sup>2+</sup>-free extracellular solution, supplemented with 200 µM EGTA, was used to prevent initiation of exocytosis by the addition of tolbutamide. In Fig. 7A,B, 20 mM of NaCl was replaced equimolarly with TEA-Cl to facilitate the detection of the Ca<sup>2+</sup> currents. All measurements were carried out at 32°C except those of Fig. 5 and 6C-F, which were performed at room temperature. The standard electrode (intracellular) solution (Figs 1, 4, 6A,B) contained (in mM) 125 K-glutamate, 10 KCl, 10 NaCl, 1 MgCl<sub>2</sub>, 5 Hepes, 10 EGTA, 3 Mg-ATP, 0.1 cAMP and 9 CaCl<sub>2</sub> (pH 7.15 with KOH). The free [Ca<sup>2+</sup>] was estimated as 1.5 µM using the binding constants of Martell and Smith (1974). All chemicals were from Sigma. Compounds were dissolved directly in the pipette solution, or added from fresh stock solutions (DMSO, final concentration <0.1%) as indicated. In Fig. 1C, the [Cl<sup>-</sup>] in the pipette was either increased to 165 mM by equimolar replacement of K-glutamate with KCl, or lowered to 2 mM by substituting KCl, NaCl and CaCl<sub>2</sub> with K-glutamate, Na-gluconate and Ca(OH)<sub>2</sub>, respectively. In Fig. 7A,B the electrode solution contained (in mM) 125 Cs-glutamate, 10 CsCl, 10 NaCl, 1 MgCl<sub>2</sub>, 0.05 EGTA, 3 Mg-ATP, 0.1 cAMP, 5 Hepes (pH 7.1 using CsOH). 5 mM Mg-ADP, 0.1 mM tolbutamide, anti-hCIC-3c (1:2000) or anti-hCIC-3n (1:500) was added to the electrode solution as indicated.

### Measurements of granular pH

Granular pH was monitored semi-quantitatively by supplementing the extracellular solution with 5 µM of the fluorescent probe LysoSensor™ Green DND-189® (Molecular Probes), which is

fluorescent only in acidic compartments. Excitation was effected using the 488 nm line of a Zeiss 510 confocal microscope and emitted light collected using a 63×/1.3NA oil objective and a >505 nm filter. It was ascertained that the initial fluorescence signal was stable before the experiments commenced and that the initial signal, using identical microscope settings, was similar in all experiments. The fluorescence was measured over the entire cell with low spatial resolution to prevent photo-bleaching of the probe. The data are presented as changes of LysoSensor-fluorescence (in per cent) over initial fluorescence after addition of tolbutamide (Fig. 5), or establishment of the standard whole-cell configuration and dialysis of cell interior (Fig. 6C–F). The latter experiments were performed at room temperature (22°C), where exocytosis is largely abolished (Renström et al., 1996), to exclude the possibility of an artefactual decrease in measured granular pH caused by cell swelling during exocytosis.

### Data analysis

In Figs 1, 4 and 6, rates of increases in cell capacitance and changes in LysoSensor-fluorescence were determined for the first minute after establishment of the standard whole-cell configuration. In Fig. 7A,B, the increases in cell capacitance elicited by the entire trains are displayed. Data are quoted as mean values  $\pm$  s.e.m. of indicated number of experiments. Statistical significance was evaluated using ANOVAR followed by Dunnet's test.

## RESULTS

### Intracellular $\text{Cl}^-$ fluxes and exocytosis

Hypoglycemic sulfonylureas potentiate  $\text{Ca}^{2+}$ -dependent exocytosis by an action that involves intracellular  $\text{Cl}^-$  fluxes (Barg et al., 1999). We now explore the role of  $\text{Cl}^-$  fluxes in  $\text{Ca}^{2+}$ -induced exocytosis in general. Fig. 1A shows the exocytotic responses obtained using the standard whole-cell configuration in which the pipette-filling electrode solution replaces the cytosol. Exocytosis was evoked by the inclusion of a  $\text{Ca}^{2+}$ /EGTA-buffer (free intracellular  $[\text{Ca}^{2+}]_i$  1.5  $\mu\text{M}$ ) to the pipette solution, which was also supplemented with 3 mM ATP and 0.1 mM cAMP to maximize the exocytotic response (Renström et al., 1996). Under control conditions, the rate of capacitance increase averaged  $32 \pm 1$  fF/s during the first 60 seconds. This corresponds to the release of 19 granules/s as every granule contributes 1.7 fF (Åmmälä et al., 1993). Inclusion of 10  $\mu\text{M}$  of the  $\text{Cl}^-$  channel blocker DIDS in the pipette solution reduced the rate of capacitance increase by 80% (Fig. 1A,B). Niflumic acid (100–500  $\mu\text{M}$ ), an inhibitor of  $\text{Ca}^{2+}$ -activated  $\text{Cl}^-$  channels, likewise inhibited exocytosis, albeit less potently. Other  $\text{Cl}^-$  channel blockers such as 5-nitro-2-(3-phenylpropylamino)-benzoic acid (NPPB) and 9AC were

ineffective (not shown). To exclude the possibility that the effects of DIDS and niflumic acid are due to actions unrelated to inhibition of  $\text{Cl}^-$  channels, we varied the cytoplasmic  $\text{Cl}^-$  concentration (Fig. 1C,D). Lowering the cytoplasmic  $\text{Cl}^-$  concentration  $[\text{Cl}^-]_i$  from the standard 40 mM to 2 mM reduced exocytosis by 93%. Increasing  $[\text{Cl}^-]_i$  to 165 mM tended to increase ( $\approx 15\%$  stimulation, not statistically different from control rate) exocytosis beyond that observed at 40 mM. Varying the extracellular  $\text{Cl}^-$  concentration between 150 mM and zero did not influence the rate of exocytosis (not shown). Substituting  $\text{Cs}^+$  or  $N$ -methyl-D-glucamine $^+$  for  $\text{K}^+$  as the major intracellular cation only marginally affected exocytosis (not shown), as did intracellular addition of the broad-spectrum  $\text{K}^+$ -channel blocker tetraethylammonium $^+$  (TEA, not shown). The data suggest the participation of (granular)  $\text{Cl}^-$ , but not  $\text{K}^+$ -channels, in exocytosis.

### Granular CIC-3 channels in the B-cell

To detect  $\text{Cl}^-$  channels in mouse insulin granules, we produced affinity-purified polyclonal antibodies directed against different cytoplasmic epitopes of the CIC-3  $\text{Cl}^-$  channel. The antibodies anti-hCIC-3n and anti-hCIC-3c, raised against synthetic peptides corresponding to residues 59–74 in the N-terminus and residues 730–744 in the C-terminal region of hCIC-3, respectively, were evaluated in large-T-antigen stabilized HEK 293 cells (tsA) stably expressing full-length human CIC-3 (Fig. 2A). Anti-hCIC-3c detected a 120 kDa protein in membrane isolates. After deglycosylation by digestion with  $N$ -glyconase for 18 hours, both antibodies detected a single  $\approx 90$  kDa immunoreactive band, which is close to the 88 kDa predicted for the hCIC-3. It was verified that the antibodies specifically interact with CIC-3 by immunoblotting in HEK 293 cells stably transfected with hCIC-1, hCIC-3, hCIC-4 or rat CIC-2 (Fig. 2B).

CIC-3 expression in mouse pancreatic islets was investigated by immunoblotting. Both anti-hCIC-3c (Fig. 2A) and anti-hCIC-3n (Fig. 2C) detected the glycosylated protein, and to a minor extent the deglycosylated form of hCIC-3 (Fig. 2A). In fractionated insulin-secreting cells, CIC-3 immunoreactivity was confined to the secretory granules (not shown). Because of the scarcity of material these experiments were made using clonal RINm5F cells. The subcellular localization of CIC-3 immunoreactivity in B-cells was detected by confocal immunofluorescence and revealed a granular distribution. The co-localization with insulin immunoreactivity was 73% (Fig. 3A), reflecting the fact that, although insulin is released upon exocytosis, CIC-3 is retained in the granule membrane. The B-

**Fig. 1.** Intracellular  $\text{Cl}^-$  fluxes control  $\text{Ca}^{2+}$ -elicited exocytosis. (A) Increases in cell capacitance ( $\Delta C$ ) evoked by infusion of the  $\text{Ca}^{2+}$ - and ATP-containing control solution (ctrl,  $n=34$ ) and in presence of niflumic acid (nifl,  $n=12$ ) or DIDS ( $n=7$ ). (B) Average rates of capacitance increase ( $\Delta C/\Delta t$ )  $\pm$  s.e.m. (C)  $\Delta C$  evoked as in (A) at 165 mM ( $n=10$ ), 40 mM ( $n=8$ ), and 2 mM ( $n=9$ ) intracellular  $[\text{Cl}^-]$  as indicated. (D) Average  $\Delta C/\Delta t$   $\pm$  s.e.m. Statistical significance was evaluated using Student's  $t$ -test. \* $P < 0.05$ ; \*\*\* $P < 0.001$ .

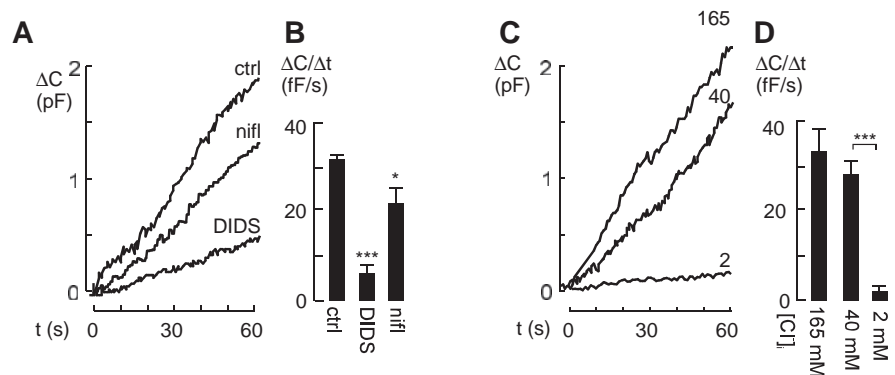



**Fig. 2.** Antibody characterization and CIC-3 expression in mouse B-cells.

Immunoblots of mouse islet homogenate and cells overexpressing CIC-3 isoforms. (A) Whole-cell lysates (10  $\mu$ g/lane), crude membrane and cytosol isolates (100  $\mu$ g/lane) were prepared from tsA cells stably transfected with full-length hCIC-3 or vector alone (mock), or from mouse islets. Anti-hCIC-3c detected a 120 kDa protein in the membrane fractions of the transfected cells. After deglycosylation with *N*-glycanase for 18 hours immunoreactivity was detected as a single band at  $\approx$ 90 kDa in the tsA cells. In islets, both the glycosylated form (double band at 115–130 kDa) as well as the deglycosylated protein ( $\approx$ 90 kDa) were detected. (B) Isoform specificity of anti-hCIC-3c was verified by immunoblotting of deglycosylated whole-cell lysates (10  $\mu$ g/lane) obtained from HEK 293 cells stably expressing hCIC-3, hCIC-1, hCIC-4 or rat CIC-2. (C) and (D), as in (A) and (B), except that anti-hCIC-3n was used.

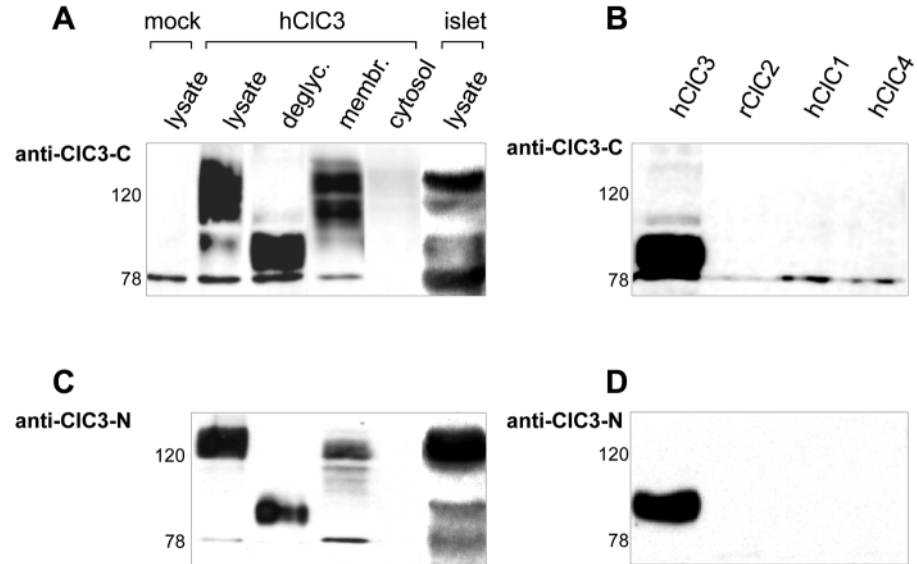

cell distribution of the CIC-3 channels was also investigated by electron microscopy combined with immunogold labeling of the binding sites (Fig. 3B). In the B-cells, CIC-3 primarily localized to the insulin-containing large dense core granules. The immunogold density in the secretory granules ( $39 \pm 2$  particles/ $\mu$ m<sup>2</sup>) was fivefold higher than the background activity ( $8 \pm 3$  particles/ $\mu$ m<sup>2</sup>;  $P < 0.001$  vs in the insulin granules,  $n = 11$ ). These results confirm that CIC-3 channels are expressed in mouse B-cells and preferentially localize to the insulin granules. No expression of CIC-2 channels was detectable (not shown).

### Importance of granular pH for exocytosis

Granular Cl<sup>−</sup> uptake has previously been suggested to promote exocytosis by an osmotic mechanism resulting in increased hydrostatic pressure inside the granule (Zimmerberg and Whittaker, 1985; Day and Hinkle, 1988). However, exocytosis was unaffected by elevating the cytosolic osmolarity with 0.3–1 M sucrose (Fig. 4A,B) or mannitol (not shown), which should counteract or even reverse possible osmotic gradients over the granular membrane. It is therefore unlikely that osmotic effects participate in the stimulation of exocytosis via Cl<sup>−</sup> fluxes and alternative mechanisms must therefore be considered. It is known that insulin-containing secretory granules acidify during their course of maturation (Hutton, 1989) and Cl<sup>−</sup> fluxes have been implicated in cellular and organellar pH regulation by charge neutralization (Al-Awqati et al., 1992). A possible role of granular pH was tested by supplementing the electrode solution with the protonophore carbonyl cyanide *m*-chlorophenylhydrazone (CCCP) (100  $\mu$ M) and this maneuver inhibited Ca<sup>2+</sup>-induced secretion by 80% (Fig. 4A,B). It should be noted that the electrode contained 3 mM ATP and the suppression of exocytosis can therefore not be accounted for by inhibition of mitochondrial ATP production. Importantly, the ability of CCCP to suppress exocytosis is dependent on cytoplasmic pH. At pH 6.6, CCCP only reduced exocytosis by 45%, from  $24 \pm 5$  fF/s ( $n = 5$ ) to  $13 \pm 4$  fF/s ( $n = 4$ ). Inhibition of exocytosis was likewise

observed in the presence of the K<sup>+</sup>/H<sup>+</sup>-exchanger nigericin (1  $\mu$ M) (Fig. 4A,B) or after addition of bafilomycin (200 nM), an inhibitor of the vesicular H<sup>+</sup>-ATPase (Fig. 4C,D). Inhibition of

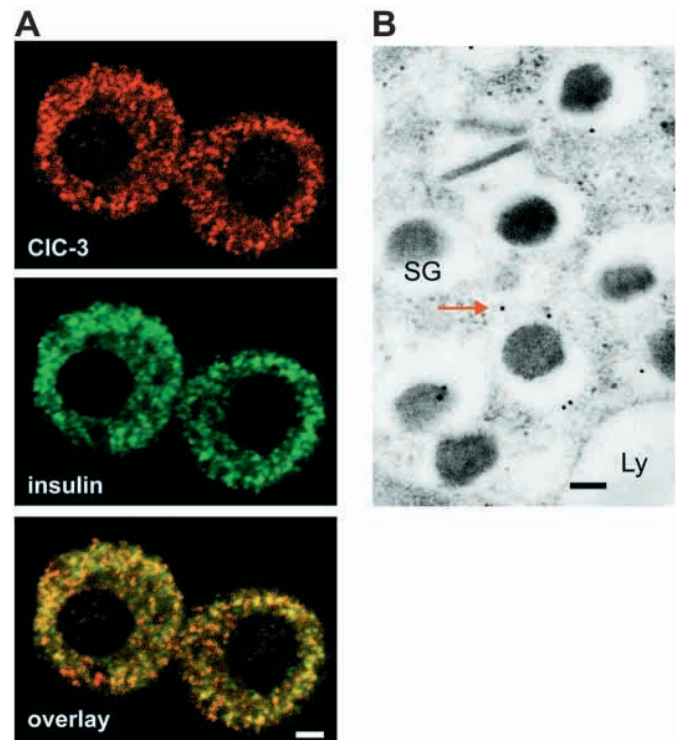

**Fig. 3.** CIC-3 channels localize to the B-cell granule membrane. (A) Distribution of anti-hCIC-3c binding, insulin immunoreactivity and overlay of anti-hCIC-3c and insulin immunoreactivity visualized by confocal immunocytochemistry. Bar, 2  $\mu$ m. (B) Immunogold detection of CIC-3 localization to insulin-containing secretory granules (SG) visualized by electron microscopy. The 12 nm gold particles appear as small black dots (arrow). Bar, 100 nm. Ly, lysosome.

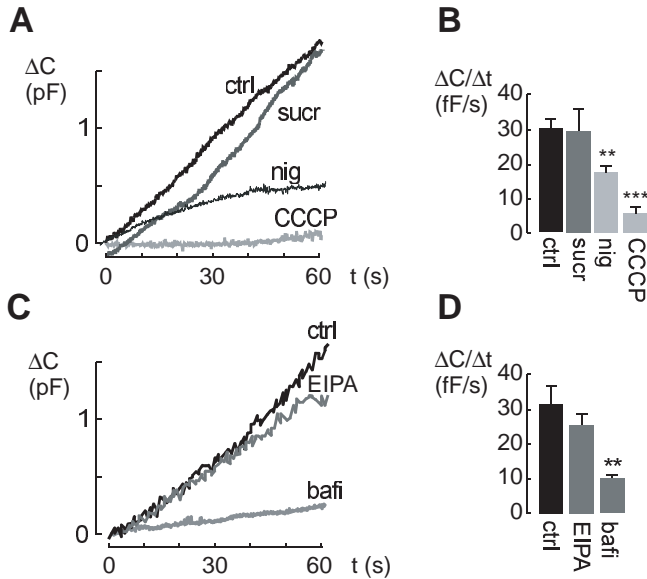

**Fig. 4.** Exocytosis requires granular acidic pH. (A) Capacitance increases ( $\Delta C$ ) elicited by infusion of the  $\text{Ca}^{2+}$ - and ATP-containing control electrode solution (ctrl,  $n=21$ ), after addition of sucrose (suc,  $n=6$ ) and in the presence of CCCP ( $n=6$ ) or nigericin (nig,  $n=5$ ). (B) Average rates of capacitance increase ( $\Delta C/\Delta t \pm \text{s.e.m.}$ ). (C)  $\Delta C$  elicited by the control solution (ctrl,  $n=9$ ), in the presence of the  $\text{Na}^+/\text{H}^+$ -exchanger inhibitor EIPA ( $n=10$ ) and the  $\text{v-H}^+$ -ATPase inhibitor bafilomycin (bafi,  $n=11$ ). (D) Mean  $\Delta C/\Delta t \pm \text{s.e.m.}$  \*\*\* $P < 0.001$  \*\* $P < 0.01$ .

$\text{Na}^+/\text{H}^+$  exchanger activity did not significantly affect  $\text{Ca}^{2+}$ -induced secretion. Although ethylisopropylamiloride (EIPA) tended to suppress exocytosis by  $\sim 20\%$  (ns vs. control; Fig. 4C,D), another inhibitor 3-methylsulfonyl-4-piperidinobenzoyl-guanidine methanesulfonate (HOE694) was completely without effect (not shown).

### Modulation of granular pH by hypoglycemic sulfonylureas

Tolbutamide, an inhibitor of B-cell  $\text{K}_{\text{ATP}}$  channels that acts by binding to the sulfonylurea receptor SUR1, stimulates exocytosis in pancreatic B-cells at a stage distal to the elevation of  $[\text{Ca}^{2+}]_i$ . This effect depends on activation of intracellular  $\text{Cl}^-$  fluxes and is inhibited by DIDS (Barg et al., 1999). These earlier observations, taken together with the findings shown in Figs 1, 3 and 4, suggest that the stimulatory effect of

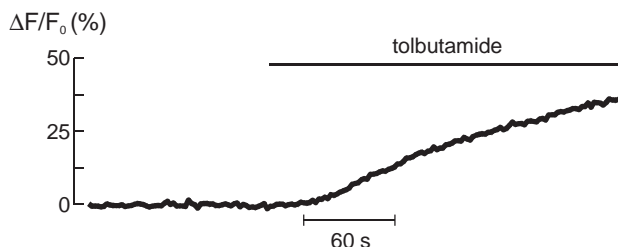

**Fig. 5.** Tolbutamide accelerates intragranular acidification. Granule acidification evoked by tolbutamide estimated as the relative increase (in per cent) in the initial LysoSensor-fluorescence signal ( $\Delta F/F_0$ ) after addition of the compound.

tolbutamide on  $\text{Ca}^{2+}$ -dependent exocytosis may involve an effect on secretory granule pH. In Fig. 5 we have tested whether tolbutamide affects intragranular pH by using the fluorescent probe LysoSensor Green DND-189, which reveals a pH-dependent fluorescence. Isolated B-cells were perfused using a  $\text{Ca}^{2+}$ -free extracellular solution to prevent initiation of insulin secretion. After the addition of  $100 \mu\text{M}$  tolbutamide to the perfusate the fluorescence signal increased promptly, indicating further acidification of the insulin granules. On average, tolbutamide increased the initial fluorescence intensity by  $35 \pm 11\%$  ( $P < 0.01$ ;  $n=9$ ). To verify that changes in LysoSensor Green fluorescence accurately report the intragranule pH, we estimated the number of lysosomes per B-cell by electron microscopy (not shown). The average B-cell contained only  $48 \pm 7$  ( $n=14$ ) lysosomes, which is negligible compared to the  $\sim 11,000$  insulin granules estimated by Dean (1973).

### Effects of granular $\text{Cl}^-$ channel modulation on granular pH and exocytosis

The stimulatory action of tolbutamide on  $\text{Ca}^{2+}$ -elicited exocytosis can be antagonized by diazoxide, an activator of  $\text{K}_{\text{ATP}}$ -channels (Barg et al., 1999). Fig. 6A,B shows that intracellularly applied diazoxide ( $0.1 \text{ mM}$ ) also inhibited  $\text{Ca}^{2+}$ -induced exocytosis by 44%. Pinacidil, an activator of vascular  $\text{K}_{\text{ATP}}$ -channels containing the SUR2A sulfonylurea receptor (Shindo et al., 1998), was ineffective (not shown).

B-cell  $\text{K}_{\text{ATP}}$ -channels are physiologically regulated by the ADP:ATP ratio via SUR1. It is interesting that the ATP:ADP ratio also modulates  $\text{Ca}^{2+}$ -elicited exocytosis in a similar fashion. After supplementing the intracellular solution with Mg-ADP ( $5 \text{ mM}$ ) in the presence of Mg-ATP ( $3 \text{ mM}$ ),  $\text{Ca}^{2+}$ -induced secretion was strongly inhibited (75%; green trace and bar in Fig. 6A,B). Thus, access to ATP alone is not sufficient to sustain exocytosis. For comparison, the effect of DIDS (cf. Fig. 1A,B) has been included (magenta trace and bar in Fig. 6A,B). The inhibitory action of ADP was fully counteracted by tolbutamide, and the rate of capacitance increase was the same as that seen under control conditions (navy blue trace and bar in Fig. 6A,B). Tolbutamide was ineffective when applied under conditions associated with close to maximum priming (intracellular solution containing  $3 \text{ mM}$  ATP,  $0.1 \text{ mM}$  cAMP and  $1.5 \mu\text{M}$   $\text{Ca}^{2+}$ ; Renström et al., 1997). In a separate series of experiments, the rate of exocytosis measured in the presence of tolbutamide averaged  $97 \pm 12\%$  ( $n=5$ ) of that seen under control conditions. The same negative observations were made when priming was suppressed by withdrawal of cytoplasmic ATP (not shown). These data allow us to discard the possibility that tolbutamide stimulates exocytosis by an unspecific mechanism. They further suggest that tolbutamide is only effective under conditions that permit priming to proceed at a submaximal velocity.

If the compounds used in Fig. 6A,B act by modulating granular  $\text{Cl}^-$  fluxes and thus proton pump activity, then their effects on granular pH should echo the changes in exocytotic capacity. In the experiments shown in Fig. 6C,D we monitored intragranular pH using LysoSensor Green DND-189. Following establishment of the whole-cell configuration and intracellular dialysis with  $3 \text{ mM}$  ATP and  $1.5 \mu\text{M}$   $[\text{Ca}^{2+}]_i$  (i.e. control conditions in Fig. 1; red trace and bar), the signal increased slightly during the first minute, indicating a net

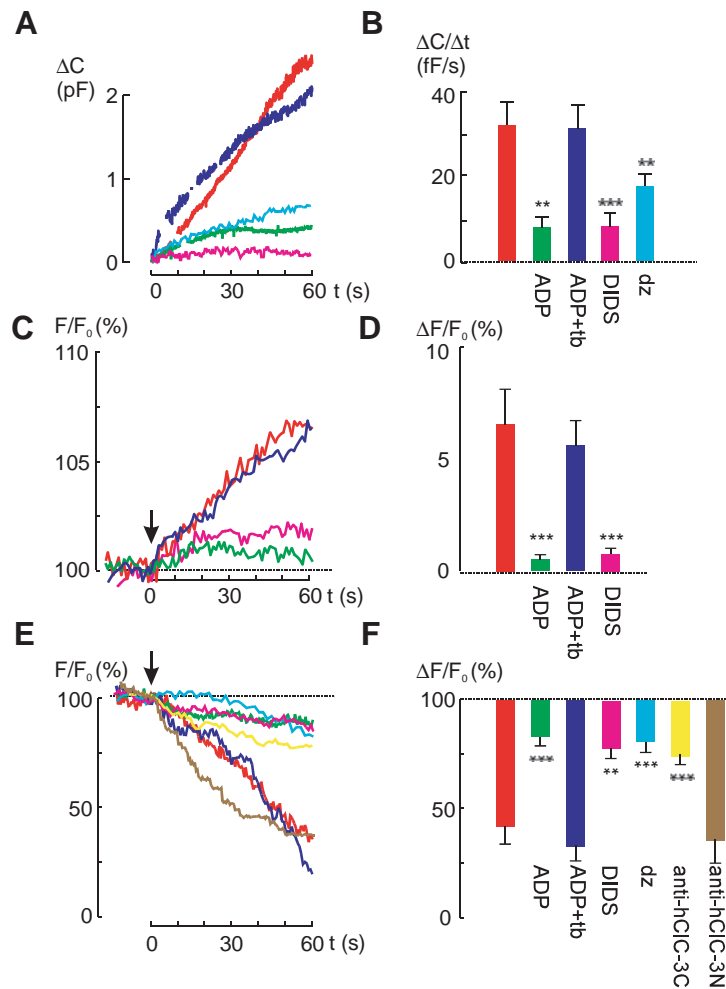

**Fig. 6.** KATP-channel effectors modulate exocytosis by influencing granular pH. (A) Increases in cell capacitance ( $\Delta C$ ) under control conditions (red,  $n=26$ ), after addition of Mg-ADP (green,  $n=12$ ), tolbutamide and Mg-ADP (blue,  $n=12$ ), diazoxide (cyan,  $n=19$ ) or DIDS (magenta,  $n=8$ ). (B) Average rate of changes in cell capacitance ( $\Delta C/\Delta t$ )  $\pm$  s.e.m.  $**P<0.01$ ;  $***P<0.001$ . (C) Changes in granular pH estimated as the relative changes (in per cent) of the initial LysoSensor-fluorescence intensity ( $F/F_0$ ) after establishment of the standard whole-cell configuration, using the  $Ca^{2+}$ - and ATP-containing control solution (red,  $n=5$ ), after addition of ADP (green,  $n=5$ ), tolbutamide and ADP (blue,  $n=5$ ) and DIDS (magenta,  $n=5$ ). The arrow indicates the establishment of the standard whole-cell configuration. (D) Average changes (per cent of initial) in LysoSensor fluorescence after 60 seconds recording ( $\Delta F/F_0$ ). Data are mean values  $\pm$  s.e.m.  $***P<0.001$ . Statistical significances were evaluated comparing the responses in the respective groups with the responses obtained with the ATP-containing control (red). (E), as in (C), but after supplementing the control pipette solution with: CCCP (red,  $n=14$ ), ADP and CCCP (green,  $n=9$ ), tolbutamide, ADP and CCCP (blue,  $n=10$ ), diazoxide and CCCP (cyan,  $n=7$ ), DIDS and CCCP (magenta,  $n=5$ ), anti-hCIC-3c and CCCP (yellow,  $n=9$ ) and anti-hCIC-3n and CCCP (brown,  $n=6$ ). The arrow indicates the establishment of the standard whole-cell configuration. (F), as in (D), but statistical significance was evaluated by comparing the responses in the respective groups with the responses obtained when CCCP was added to the control solution (red). dz, diazoxide; tb, tolbutamide. Data are mean values  $\pm$  s.e.m.  $**P<0.01$ ,  $***P<0.001$ .

granule acidification under these conditions. Intragranular acidification was almost abolished by the inclusion of either

100  $\mu M$  DIDS (magenta trace and bar in Fig. 6C,D) or 5 mM Mg-ADP (green trace and bar in Fig. 6C,D) in the pipette solution. Interestingly, inclusion of tolbutamide on top of Mg-ADP (navy blue trace and bar in Fig. 6C,D), restored granule acidification, thereby mimicking the effects of the compound on exocytosis. The same results were observed when a  $Ca^{2+}$ -free pipette solution was used, suggesting that the regulation of granular  $Cl^-$  fluxes and pH is not affected by  $[Ca^{2+}]_i$ .

To ascertain that the effects on granule pH observed in Fig. 6C,D are secondary to an effect on granular  $Cl^-$  uptake and not the result of a direct action on proton uptake, the protonophore CCCP was introduced to the cytosol (Fig. 6E,F). In keeping with the idea that the interior of the granule is acidic (pH $\approx$ 5; Hutton, 1989), addition of CCCP (100  $\mu M$ ; red trace and bar in Fig. 6E,F) to the pipette solution reduced the fluorescence as the granular pH approached that of the cytosol (pH $\approx$ 7.15). CCCP-mediated  $H^+$  efflux from the granule is electrogenic. In the absence of a counterion conductance a large electrical potential will rapidly develop when the  $H^+$  permeability is increased and this can be envisaged to prevent pH equilibration across the granule membrane. If CIC-3  $Cl^-$  channel activity is required for proton translocation over the granule membrane, then  $Cl^-$  channel inhibition should also affect  $H^+$ -efflux via the protonophore. Indeed, when the  $Cl^-$  channel inhibitor DIDS (magenta trace and bar in Fig. 6E,F) was supplemented to the ATP- and  $Ca^{2+}$ -containing pipette solution, the decrease in fluorescence evoked by CCCP was prevented. This effect of DIDS was mimicked by diazoxide (cyan trace and bar), Mg-ADP (green) and by anti-hCIC-3c (yellow), whereas anti-hCIC-3n was ineffective (brown). Tolbutamide counteracted the inhibitory action of ADP on collapsing the pH gradient fully, and in the simultaneous presence of CCCP, ADP and tolbutamide (navy blue trace and bar in Fig. 6E,F), the rate of fluorescence was almost identical to that observed in the presence of CCCP alone. Taken together, these results strongly support the idea that  $Cl^-$  ions act as counterions for  $H^+$  transport over the granule membrane and thereby modulate the secretory capacity of the B-cell.

### Granular pH controls the replenishment of secretory granules for release

Secretory granules in B-cells can be divided into the readily releasable pool (RRP) and the reserve pool (Renström et al., 1996; Renström et al., 1997; Eliasson et al., 1997). The process in which granules proceed from the reserve pool into the RRP is referred to as mobilization and involves priming by ATP hydrolysis. To determine at which stage granular ion fluxes modulate exocytosis, we recorded the secretory responses elicited by trains of ten 500 millisecond voltage-clamp depolarizations to 0 mV using the standard whole-cell configuration. Mg-ADP, tolbutamide, anti-hCIC-3c, anti-hCIC-3n or CCCP were added as indicated in Fig. 7A,B. Under control conditions (3 mM Mg-ATP and 0.1 mM cAMP), exocytosis proceeded throughout the train and the total capacitance increase averaged  $363\pm 61$  fF. Consistent with the observations in Fig. 6A,B, addition of Mg-ADP (5 mM) reduced the



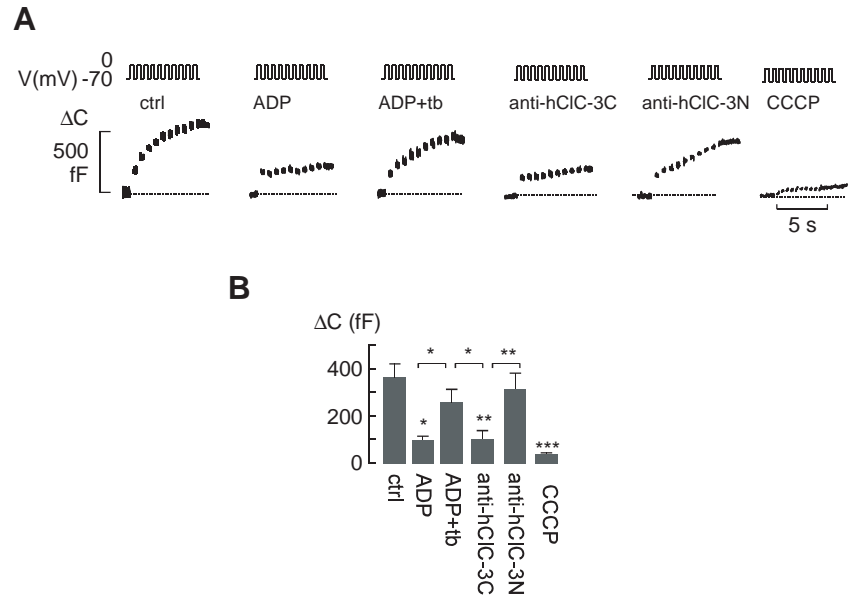

**Fig. 7.** Granular  $\text{Cl}^-$  fluxes and pH affect the recruitment of secretory granules for release. (A-B) Increases in cell capacitance ( $\Delta\text{C}$ ) evoked by a train of ten voltage-clamp depolarizations from  $-70$  mV to zero (500 milliseconds, 1 Hz) under control conditions ( $n=9$ ), after addition of Mg-ADP ( $n=4$ ), in the presence of simultaneously added tolbutamide (tb) and Mg-ADP ( $n=6$ ), after inclusion of anti-hCIC-3c ( $n=7$ ), anti-hCIC-3n ( $n=17$ ) or CCCP ( $n=6$ ) as indicated. (B) Average total increases in cell capacitance ( $\Delta\text{C}$ )  $\pm$  s.e.m. for experiments in (A). \* $P<0.05$ ; \*\* $P<0.01$ , \*\*\* $P<0.001$ .

magnitude of the capacitance increased evoked by the train by 72% ( $100 \pm 16$  fF). This effect was counteracted by tolbutamide (0.1 mM) and the magnitude of the capacitance increase evoked by the train averaged  $258 \pm 54$  fF. It is of interest that the capacitance increase evoked by the first depolarization, reflecting mainly exocytosis of RRP, was not much affected by ADP or tolbutamide and averaged  $\approx 100$  fF under all conditions. Thus, ADP seems to interfere with the refilling of RRP, but not with exocytosis of granules that have already progressed into this pool.

Inhibition of  $\text{Cl}^-$  fluxes by intracellular application of the antibody anti-hCIC-3c had effects similar to those produced by ADP and reduced the total increase in cell capacitance during the train to 29% of that seen under control conditions. Again, the capacitance increase evoked by the first pulse was only marginally affected. Similar results were obtained with DIDS (not shown). We considered the possibility that anti-hCIC-3c exerts its inhibitory effect by steric hindrance. However, this seems unlikely because supplementing the pipette solution with anti-hCIC-3n failed to affect B-cell exocytosis. The latter antibody also recognizes a cytoplasmic epitope of CIC-3

while not (unlike anti-hCIC-3c) affecting the  $\text{Cl}^-$  currents flowing through the channel (Huang et al., 2001). We also tested the role of granular pH in rapid and sustained depolarization-evoked exocytosis by supplementing the pipette solution with CCCP (100  $\mu\text{M}$ ). Under these conditions, the protonophore abolished the late component of release whereas exocytosis evoked by the first depolarization was reduced by 70% (Fig. 7A,B).

The different exocytotic responses evoked by the trains cannot be accounted for by a decrease in the  $\text{Ca}^{2+}$  current as the integrated currents were essentially unaffected by the experimental maneuvers throughout the trains. The total  $\text{Ca}^{2+}$ -current charge entry during the train averaged  $48 \pm 12$  pC ( $n=9$ ),  $62 \pm 33$  pC ( $n=4$ ),  $65 \pm 33$  pC ( $n=6$ ),  $59 \pm 22$  pC ( $n=7$ ),  $53 \pm 5$  pC

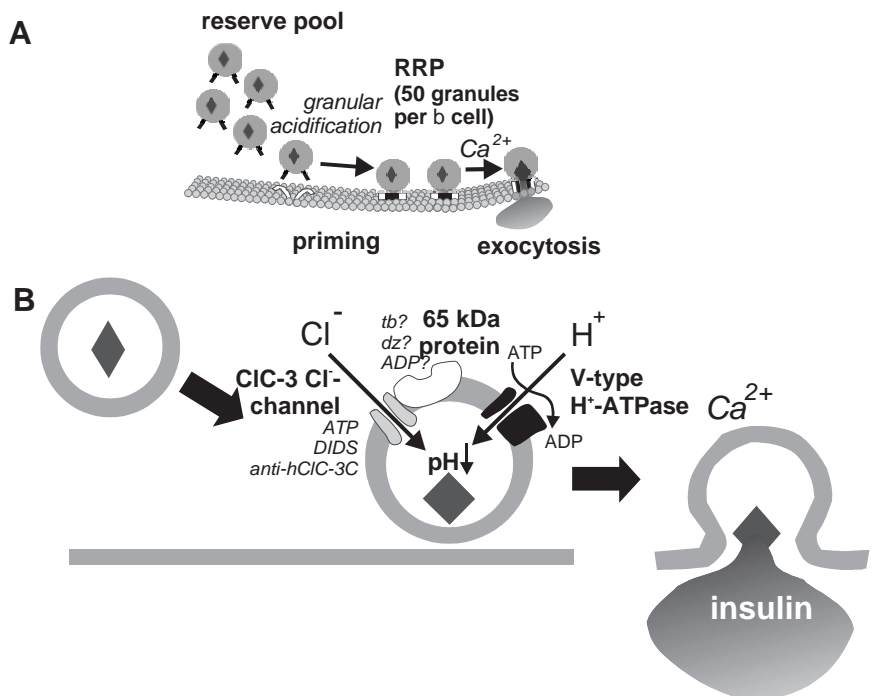

**Fig. 8.** Model for the molecular mechanisms underlying regulated granular  $\text{Cl}^-$  fluxes and their actions on intragranular pH and exocytosis. (A) Replenishment of the RRP of secretory granules depends on intragranular acidification. (B) Metabolically regulated granular  $\text{Cl}^-$  uptake through an ion channel complex comprising of CIC-3  $\text{Cl}^-$  channels (grey) and a mdr1-like 65 kDa regulatory protein (white), determines the rate of the intragranular pH decrease driven by the V-type  $\text{H}^+$ -ATPase (black). Tolbutamide (tb), diazoxide (dz) and ADP are likely to exert their actions by interacting with the regulatory 65 kDa protein, whereas ATP, DIDS and anti-hCIC-3c bind to CIC-3 directly. See text for details.

( $n=17$ ) and  $59\pm 8$  pC ( $n=5$ ) under control conditions, in the presence of ADP alone, in the simultaneous presence of ADP and tolbutamide, after addition of anti-hClC-3c, in the presence of anti-hClC-3n or CCCP, respectively.

## DISCUSSION

The recruitment of secretory granules to the RRP by ATP-dependent priming is essential for sustained secretory activity in endocrine cells and neurons. The cytosolic ATPase NSF has previously been implicated in this process (Hanson et al., 1997), but increasing evidence suggests the participation of additional or other mechanisms in the insulin-releasing B-cell (Kiraly-Borri et al., 1997). Here we propose that the acidification of the granule interior by a V-type  $H^+$ -ATPase represents a novel ATP-dependent reaction in priming. A few particularly interesting aspects of this finding will be discussed below.

### $Cl^-$ uptake controls granular acidification and exocytosis

It seems safe to conclude that  $Cl^-$  fluxes are involved in the priming of secretory granules for  $Ca^{2+}$ -elicited exocytosis in the pancreatic B-cell. Replacing cytosolic  $Cl^-$  with larger anions, pharmacological interference with intracellular  $Cl^-$  channels and application of a specific antibody against hClC-3 all severely affected replenishment of the RRP, but not exocytosis *per se*. This does not seem to be limited to the B-cell, as  $Cl^-$  is required for hormone release in a variety of other cells, like pancreatic acinar cells (Fuller et al., 1989) and pituitary melanotrophs. In the latter cell type, an apparent  $K_d$  of  $\approx 12$  mM was reported (Rupnik and Zorec, 1992). Influx of  $Cl^-$  into the granule can be envisaged to have osmotic and electrochemical effects. The latter effect appears more important in this context given the present observations that exocytosis was strongly suppressed by agents interfering with the granular pH, such as CCCP and bafilomycin, whereas it was resistant to inverting the osmotic gradient over the granular membrane (Fig. 4).

Both exocytosis and  $H^+$  fluxes over the granular membrane were stimulated by tolbutamide, but inhibited by DIDS, Mg-ADP and diazoxide (Figs 5, 6). Interestingly, a similar pharmacology has been reported for a  $Cl^-$  conductance in exocrine pancreatic zymogen granules (Thévenod et al., 1992), which depends on the activity of an ion channel complex consisting of a 65 kDa regulatory protein and ClC-2 channels (Braun et al., 1997; Carew and Thorn, 1996). This links granular  $Cl^-$  uptake to the control of intragranular pH and thereby exocytosis, and argues that the physiological and pharmacological modulators of exocytosis (such as ADP and tolbutamide) act via changes of the intragranular pH.

How can  $H^+$ -pumping by the V-type ATPase, or  $H^+$ -efflux via CCCP (Fig. 5), be controlled by the granular  $Cl^-$  conductance? In this context it is worth considering that the proton transport over the granular membrane results in the development of a considerable membrane potential. The development of a positive voltage inside the granule can be expected to prevent  $H^+$  pumping before substantial acidification has occurred (al-Awqati et al., 1992). For example, even in an unbuffered sphere of insulin granule size

(diameter 0.2  $\mu m$ ), a reduction in the pH from 7.15 to 5 (requiring translocation of only  $\approx 20$  protons) produces an electrical potential of 135 mV across the granular membrane. The fact that the insulin granule interior is indeed highly buffered (Hutton, 1989) only emphasizes the necessity of a granular counter conductance for acidification to proceed. Passive  $Cl^-$  fluxes over the granule membrane may well serve this role in the pancreatic B-cell because the cytoplasmic  $[Cl^-]$  in vivo is 75 mM (Sehlin, 1978), which is marginally higher than estimates of the intragranular concentration (Foster et al., 1993). Theoretically, the same effect can be achieved by cations moving out of the granules. Our experimental approach does not allow us to unequivocally discard the involvement of a granular cation conductance in the modulation of intragranular pH. However, the fact that the broad  $K^+$ -channel inhibitor TEA has little effect on  $Ca^{2+}$ -elicited exocytosis (not shown), taken together with the pronounced effects of intervening with the granular  $Cl^-$  fluxes, indicates that granular  $Cl^-$  uptake is quantitatively more important in this respect.

### Regulation of granular $Cl^-$ fluxes, pH and exocytosis by $K_{ATP}$ -channel agonists

The mere presence of ATP is not sufficient to ensure protracted  $Ca^{2+}$ -dependent secretion in the B-cell. In fact, addition of ADP in the continued presence of ATP potently inhibited exocytosis. This effect was mimicked by diazoxide and could be antagonized by tolbutamide (Figs 6, 7). We have previously reported that sulfonylureas directly stimulate exocytosis by a mechanism that depends on granular  $Cl^-$  fluxes and involves a 65 kDa *mdr1*-like protein in the vesicular membrane (Barg et al., 1999). A regulatory protein with identical properties has been studied in greater detail in zymogen granules. In these granules,  $Cl^-$  uptake is accelerated by ATP and tolbutamide and is inhibited by ADP or diazoxide (Thévenod et al., 1992; Braun et al., 1997). The present finding that  $H^+$  fluxes over the insulin granule membrane are strongly reduced by ADP, diazoxide and DIDS (Fig. 6C-F) clearly indicates the importance of such metabolically regulated granular  $Cl^-$  fluxes for the control of granular pH, and thus exocytosis. Interestingly, potentiation of  $Ca^{2+}$ -dependent exocytosis by sulfonylureas was recently also found in catecholamine-secreting PC12 cells (Taylor, 1999), indicating that the mechanism may be widely applicable.

### Priming of insulin granules for exocytosis by granule acidification

Agents that prevent granular  $Cl^-$  uptake or prevent acidification affected only the refilling of the RRP, whereas granules that had already proceeded into this pool remained releaseable when  $[Ca^{2+}]_i$  was subsequently elevated (Fig. 7). This suggests that priming of granules for exocytosis depends on intragranular acidification, and we propose that the ATP dependence of priming in B-cells also reflects the activity of the V-type  $H^+$ -ATPase in the granule membrane. A role for low vesicular pH in the control of slow-phase glutamate release has recently been reported in synaptosomes (Zoccarato et al., 1999), suggesting that the mechanisms we describe here for the B-cell has its counterpart in other cells exhibiting regulated exocytosis. The finding that CCCP interferes with both the early (triggered by the first depolarization) and late components of exocytosis (Fig. 7A) further suggests that a low intragranular pH is required not only for the priming of the



granules but also for the maintenance of the granules in a releasable state. These observations are in good agreement with those made in other secretory cell types, like pituitary melanotrophs (Thomas et al., 1993), synaptosomes (Zoccorato et al., 1999) and glucagon-releasing pancreatic  $\alpha$ -cells (Hoy et al., 2000), but appear at variance with early reports in permeabilized catecholamine-releasing chromaffin cells (Knight and Baker, 1985).

### A model for metabolic modulation of rate of insulin granule priming

A model that accounts for our observations is presented in Fig. 8. The refilling of RRP depends on the priming of granules that originally belonged to the reserve pool. Our data suggest that the secretory granules gain release competence by intragranular acidification (Fig. 8A). This depends on the simultaneous operation of the V-type  $H^+$ -ATPase and the CIC-3  $Cl^-$  channel (Fig. 8B, middle panel). By analogy to the regulation of the  $K_{ATP}$ -channel in the plasma membrane (Gribble et al., 1997), we speculate that CIC-3 and a regulatory *mdr1*-like 65 kDa protein (Barg et al., 1999) form an ion channel complex in the granular membrane. In this scenario, ATP enhances granular  $Cl^-$  uptake, acidification and priming by a direct interaction with CIC-3, whereas ADP attenuates the same chain of events by binding to the regulatory 65 kDa protein. We propose that tolbutamide interacts with the 65 kDa protein and prevents ADP binding, thereby counteracting the inhibitory effects of ADP on priming. Previous reports have demonstrated that glucose, in addition to  $K_{ATP}$ -channel closure and B-cell depolarization, also stimulates insulin secretion by an additional effect that depends on metabolization of the sugar (cf review Aizawa et al., 1992; Gembal et al., 1993; Eliasson et al., 1997). Recently, production of intracellular glutamate from the Krebs cycle intermediate  $\alpha$ -ketoglutarate has been suggested to serve such a stimulatory role in the B-cell (Maechler and Wollheim, 1999). Glutamate is probably transported into the secretory granules by the recently cloned glutamate transporter VGLUT1 (Bellochio et al., 2000; Takamori et al., 2000). Granular uptake of the organic anion facilitates B-cell exocytosis by an as yet unidentified mechanism. In other systems it coincides with acidification on the target side, perhaps by glutamate serving as a counterion for the protons (Bellochio et al., 2000). This is reminiscent of the scenario proposed in our model and suggests an interesting physiological role for the regulatory 65 kDa protein in insulin secretion. By translating an increase in extracellular glucose, and the associated increase in the cytoplasmic ATP:ADP ratio, to acceleration of priming of insulin granules for release the 65 kDa protein adjusts the secretory capacity of the B-cell to the functional demands. This mechanism is likely to contribute to the  $K_{ATP}$ -channel-independent action of glucose in mouse B-cells.

We thank Kristina Borglid for expert technical assistance. This work was supported by Stiftelsen for Vetenskapligt Arbete inom Diabetologi, the Svenska Sällskapet för Medicinsk Forskning, Kungliga Fysiografiska Sällskapet i Lund, Dir. Albert Pålssons Stiftelse, Svenska Läkaresällskapet, the Crafoordska Stiftelsen, the Swedish Medical Research Council (grants no 8647, 12234 and 13147), the Knut and Alice Wallenbergs Stiftelse, the Swedish Diabetes Association, the Novo Nordisk Foundation, Magnus Bergvalls Stiftelse, the Åke Wibergs Stiftelse and NIH grant RO1 GM 3682.

### REFERENCES

- Aizawa, T., Sato, Y., Komatsu, M. and Hashizume, K. (1992). ATP-sensitive  $K^+$  channel-independent, insulinotropic action of glucose in the B-cells. *Endocr. Regul.* **26**, 159-162.
- al-Awqati, Q., Barasch, J. and Landry, D. (1992). Chloride channels of intracellular organelles and their potential role in cystic fibrosis. *J. Exp. Biol.* **172**, 245-266.
- Ämmälä, C., Eliasson, L., Bokvist, K., Larsson, O., Ashcroft, F. M. and Rorsman, P. (1993). Exocytosis elicited by action potentials and voltage-clamp calcium currents in individual mouse pancreatic B-cells. *J. Physiol. (Lond.)* **472**, 665-688.
- Ashcroft, F. M. and Rorsman, P. (1995). In *The Electrophysiology of Neuroendocrine Cells*, Vol. 10 (ed. Heschler, J. and Scherübl, H.), pp. 207-243. Boca Raton, FL, USA: CRC Press.
- Barg, S., Renström, E., Berggren, P.-O., Bertorello, A., Bokvist, K., Braun, M., Eliasson, L., Holmes, W., Köhler, M., Rorsman, P. et al. (1999). The stimulatory action of tolbutamide on  $Ca^{2+}$ -dependent exocytosis in pancreatic  $\beta$  cells is mediated by a 65-kDa *mdr*-like P-glycoprotein. *Proc. Natl. Acad. Sci. USA*. **96**, 5539-5544.
- Bellochio, E. E., Reimer, R. J., Freneau, R. T., Jr and Edwards, R. H. (2000). Uptake of glutamate into synaptic vesicles by an inorganic phosphate transporter. *Science* **289**, 957-960.
- Braun, M., Anderie, I. and Thévenod, F. (1997). Evidence for a 65 kDa sulphonylurea receptor in rat pancreatic zymogen granule membranes. *FEBS Lett.* **411**, 255-299.
- Carew, M. A. and Thorn, P. (1996). Identification of CIC-2-like chloride currents in pig pancreatic acinar cells. *Pflügers Arch.* **433**, 84-90.
- Day, R. N. and Hinkle, P. M. (1988). Osmotic regulation of prolactin secretion. Possible role of chloride. *J. Biol. Chem.* **263**, 15915-15921.
- Dean, P. M. (1973). Ultrastructural morphometry of the pancreatic B-cell. *Diabetologia* **9**, 115-119.
- DeHoff, R. T. and Rhines, F. N. (1961). Determination of the number of particles per unit volume from measurements made on plane sections: The general cylinder and ellipsoid. *Trans. Amer. Inst. Mining Met. Petrol. Engrs.* **221**, 975-982.
- Eliasson, L., Renström, E., Ämmälä, C., Berggren, P.-O., Bertorello, A., Bokvist, K., Chibalin, A., Deeney, J. T., Flatt, P. R., Gäbel, J. et al. (1996). PKC-dependent stimulation of exocytosis by sulphonylureas in pancreatic beta cells. *Science* **271**, 813-815.
- Eliasson, L., Renström, R., Ding, W. G., Proks, P. and Rorsman, P. (1997). Rapid ATP-dependent priming of secretory granules precedes  $Ca^{2+}$ -induced exocytosis in mouse pancreatic B-cells. *J. Physiol. (Lond.)* **503**, 399-412.
- Foster, M. C., Leapman, R. D., Li, M. X. and Atwater, I. (1993). Elemental composition of secretory granules in pancreatic islets of Langerhans. *Biophys. J.* **64**, 525-532.
- Fuller, C. M., Eckardt, L. and Schulz, I. (1989). Ionic and osmotic dependence of secretion from permeabilised acini of the rat pancreas. *Pflügers Arch.* **413**, 385-394.
- Gembal, M., Detimary, P., Gilon, P., Gao, Z. Y. and Henquin, J. (1993). Mechanisms by which glucose can control insulin release independently from its action on adenosine triphosphate-sensitive  $K^+$  channels in mouse B cells. *J. Clin. Invest.* **91**, 871-880.
- Gribble, F. M., Tucker, S. J. and Ashcroft, F. M. (1997). The interaction of nucleotides with the tolbutamide block of cloned ATP-sensitive  $K^+$  channel currents expressed in *Xenopus* oocytes: a reinterpretation. *J. Physiol. (Lond.)* **504**, 35-45.
- Hanson, P. I., Heuser, J. E. and Jahn, R. (1997). Neurotransmitter release – four years of SNARE complexes. *Curr. Opin. Neurobiol.* **7**, 310-315.
- Hay, J., Fiset, P. L., Jenkins, G. H., Fukami, K., Takenawa, T., Anderson, R. A. and Martin, T. F. (1995). ATP-dependent inositolide phosphorylation required for  $Ca^{2+}$ -activated secretion. *Nature* **374**, 173-177.
- Hoy, M., Olsen, H. L., Bokvist, K., Buschard, K., Barg, S., Rorsman, P. and Gromada, J. (2000). Tolbutamide stimulates exocytosis of glucagon by inhibition of a mitochondrial-like ATP-sensitive  $K^+$  ( $K_{ATP}$ ) conductance in rat pancreatic A-cells. *J. Physiol.* **527**, 109-120.
- Huang, P., Liu, J., Di, A., Robinson, N. C., Musch, M. W., Kaezel, M. A. and Nelson, D. J. (2001). Regulation of human CIC-3 channels by multifunctional  $Ca^{2+}$ /calmodulin dependent protein kinase. *J. Biol. Chem.* (in press).
- Hutton, J. C. (1989). The insulin secretory granule. *Diabetologia* **32**, 271-281.
- Kiraly-Borri, C. E., Morgan, A., Burgoyne, R. D., Weller, U., Wollheim,

- C. B. and Lang, J.** (1996). Soluble N-ethylmaleimide-sensitive-factor attachment protein and N-ethylmaleimide-insensitive factors are required for  $\text{Ca}^{2+}$ -stimulated exocytosis of insulin. *Biochem. J.* **314**, 199-203.
- Knight, D. E. and Baker, P. F.** (1985). The chromaffin granule proton pump and calcium-dependent exocytosis in bovine adrenal medullary cells. *J. Membr. Biol.* **83**, 147-156.
- Maechler, P. and Wollheim, C. B.** (1999). Mitochondrial glutamate acts as a messenger in glucose-induced insulin exocytosis. *Nature* **402**, 685-689.
- Renström, E., Eliasson, L., Bokvist, K. and Rorsman, P.** (1996). Cooling inhibits exocytosis in single mouse pancreatic B-cells by suppression of granule mobilization. *J. Physiol. (Lond.)* **494**, 41-52.
- Renström, E., Eliasson, L. and Rorsman, P.** (1997). Protein kinase A-dependent and -independent stimulation of exocytosis by cAMP in mouse pancreatic B-cells. *J. Physiol.* **502**, 105-118.
- Rupnik, M. and Zorec, R.** (1992). Cytosolic chloride ions stimulate  $\text{Ca}^{2+}$ -induced exocytosis in melanotrophs. *FEBS Lett.* **303**, 221-223.
- Sehlin, J.** (1978). Interrelationship between chloride fluxes in pancreatic islets and insulin release. *Am. J. Physiol.* **235**, E501-E508.
- Sutton, R. B., Fasshauer, D., Jahn, R. and Brünger, A. T.** (1998). Crystal structure of a SNARE complex involved in synaptic exocytosis at 2.4 Å resolution. *Nature* **395**, 347-353.
- Takamori, S., Rhee, J. S., Rosenmund, C. and Jahn, R.** (2000) Identification of a vesicular glutamate transporter that defines a glutaminergic phenotype in neurons. *Nature* **407**, 189-194.
- Taylor, S. C., Carpenter, E., Roberts, M. L. and Peers, C.** (1999). Potentiation of quantal catecholamine secretion by glibenclamide: evidence for a novel role of sulphonylurea receptors in regulating the  $\text{Ca}^{2+}$  sensitivity of exocytosis. *J. Neurosci.* **19**, 5741-5749.
- Thévenod, F., Chatandi, K. V., Jiang, B. and Hopfer, U.** (1992) ATP-sensitive  $\text{K}^{+}$ -conductance in pancreatic zymogen granules: Block by glyburide and activation by diazoxide. *J. Membr. Biol.* **129**, 253-266.
- Thomas, P., Wong, J. G., Lee, A. K. and Almers, W.** (1993). A low affinity  $\text{Ca}^{2+}$  receptor controls the final steps in peptide secretion from pituitary melanotrophs. *Neuron* **11**, 93-104.
- Zimmerberg, J. and Whittaker, M.** (1985). Irreversible swelling of secretory granules during exocytosis caused by calcium. *Nature* **315**, 581-584.
- Zoccarato, F., Cavallini, L. and Alexandre, A.** (1999). The pH-sensitive dye acridine orange as a tool to monitor exocytosis/endocytosis in synaptosomes. *J. Neurochem.* **72**, 625-633.
